# Supplementary material for: Metabolomics reveals the physiological response of Pseudomonas putida KT2440 (UWC1) after pharmaceutical exposure
Source: Royal Society of Chemistry journal article supplement (doi:10.1039/c5mb00889a), 2016-02-24
Supplement: c5mb00889a1.pdf [file c5mb00889a1.pdf]

Currie, F. *et al.*

Supplementary Information 1 for the paper ‘**Metabolomics reveals the physiological response of *Pseudomonas putida* KT2440 (UWC1) after pharmaceutical exposure.**’  
**Materials and Methods**

**1 Materials and Methods**

2 *Culture of microbial cells:* Axenic cultures of *P. putida* KT2440 UWC1 were prepared  
3 on nutrient agar and used to prepare an inoculum in 24 mL R2A medium (19h, 20°C,  
4 200 rpm), with an  $OD_{\lambda 470nm} = 1.0$  AU. This was used to inoculate experimental cultures  
5 at 5  $\mu$ L mL<sup>-1</sup>. R2A medium: (g L<sup>-1</sup>): yeast extract (0.5), protease peptone (0.5),  
6 casamino acids (0.5), glucose (0.5), soluble starch (0.5), Na pyruvate (0.3), K<sub>2</sub>HPO<sub>4</sub>  
7 (0.3), MgSO<sub>4</sub>·7H<sub>2</sub>O (0.05), pH 7.2 (KH<sub>2</sub>PO<sub>4</sub>). Pharmaceuticals were obtained from  
8 Sigma Aldrich, Gillingham, UK. Standard solutions of the pharmaceuticals were  
9 prepared at 1.25 mg mL<sup>-1</sup> and filter sterilized.

10

11 Experiments were carried out in shaken culture at a 25 mL scale in replicate 100 mL  
12 flasks containing 24 mL R2A medium. 1 mL of 1.25 mg mL<sup>-1</sup> filter sterilized standard  
13 solutions of the individual pharmaceuticals were added to replicate flasks, giving final  
14 concentrations of 50  $\mu$ g mL<sup>-1</sup>, and 1 mL filter sterilized water was added to replicate  
15 flasks as a control. Where samples of culture were removed prior to standard addition  
16 (e.g. for OD measurement or initial sampling) the volume of standard added was  
17 adjusted accordingly. Cultures were inoculated with 125  $\mu$ L *P. putida*  $OD_{\lambda 470nm} = 1.0$   
18 AU and incubated at 20 °C, 200 rpm (150 rpm) for 15 h (the end of the exponential  
19 growth phase) in an orbital incubator.

20

21 In a preliminary experiment the estimation of minimum inhibitory concentration (MIC)  
22 of the pharmaceuticals for *P. putida* KT2440 UWC1 was carried out by a tube dilution  
23 method. For each pharmaceutical, a triplicate series of tubes containing the drug in 10  
24 mL R2A medium at concentrations of 2.5, 2.25, 2.0, 1.75, 1.5, 1.25, 1.0, 0.75, 0.5, 0.25,

25 0.2, 0.1, 0.05 and 0 mg mL<sup>-1</sup> was prepared. Tubes were inoculated with 50 µL of a 19 h  
26 inoculum of KT2440 (OD<sub>λ470nm</sub>=1.0 AU) and incubated at 20 °C. At 24 h and 48 h  
27 growth in the tubes was estimated visually and recorded. Three replicates were  
28 inoculated with 100 µL filter sterilized water as a negative control. The MIC for  
29 acetaminophen was found to be 2.5 mg mL<sup>-1</sup>, for atenolol >2.5 mg mL<sup>-1</sup>, for diclofenac  
30 >2.5 mg mL<sup>-1</sup>, for ibuprofen >1 mg mL<sup>-1</sup>, for mefenamic acid >1 mg mL<sup>-1</sup>, and for  
31 propranolol 0.5 mg mL<sup>-1</sup>. In this study we exposed *P. putida* KT2440 to the  
32 pharmaceuticals at 50 µg mL<sup>-1</sup>; although higher than measured environmental  
33 concentrations in the UK, this is a concentration at least ten fold below the minimum  
34 inhibitory concentrations established for the pharmaceuticals, and at which we had seen  
35 a measurable effect for exposure to propranolol in earlier experiments using FT-IR  
36 spectroscopy. Having optimized the exposure concentrations for propranolol the same  
37 exposure concentrations were selected for all other drugs.

38

39 In order to determine the effect of each pharmaceutical on growth, the growth rates for  
40 *P. putida* exposed to each pharmaceutical at 50 µg mL<sup>-1</sup> or water as a control were  
41 measured, initially using a Bioscreen C 200 microbiology workstation (Oy Growth  
42 Curves AB Ltd., Finland). Using a Bioscreen 100 well plate, 5 replicate wells  
43 containing 200 µL R2A medium containing each pharmaceutical at 50 µg mL<sup>-1</sup> were  
44 inoculated with 2 µL of a 19 h inoculum of *P. putida* (OD<sub>λ470nm</sub> = 1.0 AU) and  
45 incubated at 20 °C, with shaking. OD readings were taken using a broad-band filter at  
46 30 minute intervals for 16 h, growth curves plotted and the growth rate calculated for  
47 the exponential growth phase using Microsoft Excel. Growth rates were also measured  
48 in shaken culture comparable to the metabolomics experiments. For *P. putida* exposed

49 to each pharmaceutical or water as a control, growth was measured in triplicate cultures  
50 at a 25 mL scale. OD readings were measured at 470nm for a 1:10 dilution of samples  
51 taken at hourly intervals over a 21 h period, growth curves plotted and the growth rate  
52 calculated for the exponential growth phase using Microsoft Excel.

53

54 *Monitoring recovery of the pharmaceuticals by HPLC:* The recovery of the  
55 pharmaceuticals was monitored by HPLC in order to assess if there was any metabolism  
56 of the pharmaceuticals by *P. putida* over 24 h, and to observe the stability of the drugs  
57 in the culture medium. The culture of cells for the HPLC analysis was carried out in  
58 replicate at a 25 mL scale. For each pharmaceutical at a concentration of 50 µg mL<sup>-1</sup>  
59 and water as a control, 6 replicate flasks were set up, and 3 of the replicate flasks were  
60 inoculated with *P. putida* and incubated at 20 °C, 200 rpm for 24 h. The remaining 3  
61 replicates were inoculated with 125 µL filter sterilized water as negative controls. At 24  
62 h the cultures (20mL) and controls were harvested and centrifuged (7697 g, 4 °C, 3  
63 min). 2 mL supernatant was filtered through a 0.2 µ syringe filter for HPLC. The cells  
64 were washed with water three times, and extracted with methanol (1.0 mL) with 3  
65 cycles of freeze-thawing and sonication (samples were frozen in liquid nitrogen, thawed  
66 at 20 °C, sonicated for 3 min and vortexed thoroughly (L&R T9 sonicator, L&R  
67 Manufacturing, NJ, US). After centrifugation in a chilled centrifuge (7697 x g, 4 °C, 3  
68 min) 500 µL of the methanol supernatant was added to 2.0 mL methanol for HPLC,  
69 representing a 4 fold concentration of the original culture. HPLC was performed using  
70 an Agilent HPLC system (Agilent, Stockport, UK) on a Phenomenex Spherclone ODS  
71 column (250 x 4.6 mm, 5 micron, Phenomenex, Macclesfield, UK). Water and  
72 acetonitrile were chromatography grade and supplied by Sigma Aldrich, Gillingham,

73 UK. Pharmaceutical compounds, formic acid, potassium phosphate monobasic  
74 ( $\text{KH}_2\text{PO}_4$ ) and orthophosphoric acid were obtained from Sigma Aldrich. Phosphate  
75 buffer (pH 3.8) was prepared by diluting  $\text{KH}_2\text{PO}_4$  3.13 g in 1L water and adjusting the  
76 pH with orthophosphoric acid 10%. Acetaminophen, diclofenac, ibuprofen and  
77 mefenamic acid were analysed using water and acetonitrile containing 0.1% formic acid  
78 with a flow rate of  $0.5 \text{ mL min}^{-1}$  and a gradient of 10-100% acetonitrile over 0-10 min  
79 followed by 10 min at 100% acetonitrile. atenolol and propranolol were analysed with a  
80 gradient of acetonitrile and phosphate buffer pH 3.8.<sup>1</sup> The acetonitrile content of the  
81 mobile phase was increased linearly from 10 to 50% over 20 min followed by 7 min at  
82 50% acetonitrile. Six point standard curves were calculated for the APIs at  
83 concentrations of 5, 10, 30, 50, 70 and  $90 \mu\text{g mL}^{-1}$ . The standard curves with a linear  
84 trendline through the origin were calculated in Microsoft Excel on the basis of mean  
85 peak area. Where standards at the lowest concentrations were not in the range giving a  
86 linear response the line was recalculated for the four highest concentrations.  
87 Experimental values were calculated in Excel using  $y = mx + c$ .  
88

89 *The culture of cells for the FT-IR and GC-MS analysis* was carried out in replicate at the  
90 25 ml scale described above in 5 replicate flasks containing each drug at  $50 \mu\text{g mL}^{-1}$ .  
91 Cultures inoculated with *P. putida* were incubated at 20 °C, 200 rpm for 15 h in an  
92 orbital incubator. Sample inoculation was randomized between classes and staggered to  
93 enable fast and reproducible sample processing. At the end of the exponential growth  
94 phase (15 h) the cells were harvested as described below for FT-IR and GC-MS as  
95 rapidly as possible; quenching was not performed in this experiment due to previously  
96 observed fragility of cells grown with the pharmaceuticals. (Indeed, initial

97 measurements for ATP utilizing a quenching and extraction method showed up to 90%  
98 of the ATP to be present in the quenching supernatant rather than the subsequent  
99 methanol cell extract, and cells were later harvested for ATP measurement using a  
100 direct quenching and extraction method in 100% Methanol at -48 °C.) During sample  
101 processing samples were kept on ice and centrifugation steps were carried out in chilled  
102 centrifuges in order to minimise further cell metabolism.

103

104 *Metabolite fingerprinting of whole cells by FTIR spectroscopy* was carried out  
105 according to a modified method of Goodacre *et al.*<sup>2</sup> For FT-IR analysis 1.9 mL culture  
106 was removed to centrifuge tubes and centrifuged in a chilled centrifuge (7697 g, 4° C, 3  
107 min, accuSpin Micro R; Fisher Scientific) and the supernatant discarded. The cells were  
108 washed with ice cold water (2 x 0.5 mL), centrifuged and the supernatant discarded.  
109 Cells were snap frozen in liquid nitrogen and stored at -80 °C prior to analysis. Frozen  
110 cells were thawed, resuspended in 25-50 µL water, the amount calculated to give an IR  
111 absorbance between 0.4 and 1.4 AU at 1665 cm<sup>-1</sup>. 5µL samples were randomized and  
112 spotted on a silicon FT-IR plate. The samples were dried at 50°C for 30 min. Triplicate  
113 FT-IR spectra were collected on a Bruker Equinox 55 FT-IR spectrometer using OPUS  
114 software version 4. Spectra were collected in absorbance mode, from 4000-600 cm<sup>-1</sup>,  
115 with a resolution of 4 cm<sup>-1</sup>, with a sampling time of 64 scans. Spectra were baseline  
116 corrected using rubber-band baseline correction using the instrument software and  
117 exported in ASCII format for analysis in MATLAB.<sup>3</sup> Within MATLAB CO<sub>2</sub>  
118 absorbances were removed, the individual spectra were scaled between zero for the  
119 lowest recorded and 1 for the highest recorded absorbances. Data corresponding to

120 2826-1774cm<sup>-1</sup> were also removed as there is no biologically relevant information in  
121 this part of the spectrum, and the variables scaled to unit variance.

122

123 *Metabolite profiling of methanol cell extracts by GC-MS* was carried out according to a  
124 modified method of Winder *et al.*<sup>4</sup> using GC-MS conditions optimized for yeast.<sup>5</sup> For  
125 GC-MS analysis 17 mL culture was transferred to a centrifuge tube, centrifuged in a  
126 chilled centrifuge (2521 g, 4 °C, 10 min, CR322; Jouan) and the supernatant removed  
127 and discarded. The cells were washed in ice cold water (2 x 0.5 mL) and transferred to  
128 centrifuge tubes, centrifuged in a chilled centrifuge (7697 g, 4 °C, 3 min) and the  
129 supernatant removed and discarded. Cells were snap frozen in liquid nitrogen and stored  
130 at -80 °C. The cells were subsequently extracted with 0.5 mL cold methanol (kept on  
131 dry ice (-78.5 °C)) through 3 freeze-thaw cycles as described above. After  
132 centrifugation (7697 x g, 4 °C, 3min) the methanol was removed to clean 1.5 mL  
133 centrifuge tubes. The lysed cells were extracted with a further 0.5 mL cold methanol,  
134 centrifuged and the supernatant combined with the first extract. 100 µL succinic d<sub>4</sub> acid  
135 (0.083 mg mL<sup>-1</sup>) was added as an internal standard. The samples were dried *in vacuo* in  
136 a HETO VR MAXI vacuum centrifuge attached to a HETO CT/DW 60E cooling trap  
137 (Thermo Life Sciences, Basingstoke UK), and stored at -80°C prior to derivatization for  
138 GC-MS. Standards of the individual pharmaceuticals containing 0.25 mg of each  
139 pharmaceutical and 100 µL internal standard solution, were prepared and dried.  
140 Standard mixtures of the pharmaceuticals, containing 1.0, 0.75, 0.5, 0.25, 0.1 and 0.01  
141 mg of the pharmaceuticals, containing 100 µL internal standard solution, were also  
142 prepared and dried. The samples were derivatized for GC-MS with O-  
143 methylhydroxylamine hydrochloride (40 µL, 20 mg mL<sup>-1</sup> in pyridine, 40°C, 80 min)

144 followed by N-Methyl-N-(trimethylsilyl)trifluoroacetamide (MSTFA) (40  $\mu$ L, 40°C,  
145 80min). 20  $\mu$ L of a retention index solution (0.6 mg mL<sup>-1</sup> n-C10, n-C12, n-C15, n-C19  
146 and n-C22 alkanes in pyridine) was added prior to analysis. Samples were randomized  
147 and triplicate analytical samples were run on a GC-TOF-MS instrument (Agilent 6890N  
148 gas chromatograph and LECO Pegasus III TOF mass spectrometer) using the  
149 manufacturer’s software (ChromaTOF version 2.15) and an optimized method  
150 developed for yeast. Data processing was performed as previously described<sup>6</sup>, applying  
151 the ChromaTOF software, to construct a data matrix of metabolite peak vs. sample and  
152 infilled with peak areas for metabolites detected. The S/N threshold was set at 10,  
153 baseline offset at 1.0, data points for averaging at 3, and peak width at 3s. A database of  
154 metabolites present in typical sample classes was constructed from samples with each  
155 pharmaceutical and control. All peaks detected in samples that were present in the  
156 metabolite database were subsequently matched on retention index and mass-spectrum.  
157 A matrix of response ratios to the internal standard (peak area metabolite / peak area  
158 internal standard) was generated for peaks with a database match >750 and retention  
159 index match +/- 10. Since a metabolite may not be detected in all analytical replicates  
160 of a sample there is a need to fill in missing values in the matrix of response ratios.  
161 Where a metabolite was present in two out of the three analytical replicates, the mean of  
162 the two values detected was used to replace the missing value. Where a metabolite was  
163 detected in only one out of the three analytical replicates, this value was replaced with  
164 zero. Additionally, data for any metabolite was only retained if it was present in 75% of  
165 the biological replicates for any one class, resulting in a dataset for 150 metabolites.  
166 Furthermore, metabolites were excluded from the univariate statistical analyses for each  
167 pharmaceutical if absent from both the samples exposed to the drug and the samples

168 exposed to water. Variables (the peak ratios for each metabolite) were scaled to median  
169 absolute deviation because GC-MS data is especially skewed, i.e. not a normal  
170 distribution.

171

172 *ATP Analysis:* In an experiment conducted at a 25 mL scale, 12 replicate cultures were  
173 inoculated with 125  $\mu$ L *P. putida* KT2440 ( $OD_{\lambda_{470nm}} = 1.0$  AU) and incubated at 20 °C,  
174 150 rpm. OD measurements at  $\lambda_{470nm}$  were taken throughout the experiment including  
175 the sampling times. At 10.5 h, approximately half-way through the exponential growth  
176 phase ( $OD_{\lambda_{470nm}} = 0.9$  AU), 0.9 mL culture sample was taken and quenched and  
177 extracted in 0.9 mL 100% methanol at -48 °C. Samples were snap frozen in liquid  
178 nitrogen and stored at -80 °C overnight. At 11 h, a 1.25 mg mL<sup>-1</sup> filter sterilized  
179 standard solution of propranolol was added to 6 replicate flasks, to give a final  
180 concentration of 50  $\mu$ g mL<sup>-1</sup>, and filter sterilized water was added to 6 replicate flasks as  
181 a control. Both sample inoculation and propranolol and water addition were randomized  
182 between classes, and staggered to enable fast and reproducible sample processing. At  
183 12 h (1 h after propranolol addition) 0.9 mL culture was harvested as described above.  
184 Samples were centrifuged (7697 g, 4 °C, 3min) and the supernatant removed to a new  
185 centrifuge tube. Samples were standardized to unit OD, transferring an aliquot to new  
186 centrifuge tubes, the volume taken being inversely proportional to the  $OD_{\lambda_{470nm}}$   
187 measurement taken at the time of sampling. Samples were dried in a vacuum centrifuge  
188 as described above and stored at -80°C for further analysis. ATP concentration was  
189 measured using a bioluminescence assay kit available from Roche Molecular  
190 Biochemicals (Roche Diagnostics, Burgess Hill UK) and following the manufacturer’s  
191 instructions. For ATP measurement samples were reconstituted in 200  $\mu$ L water, and 50

192  $\mu\text{L}$  was diluted 2-fold, duplicate 40  $\mu\text{L}$  aliquots were mixed with 40  $\mu\text{L}$  luciferase  
193 reagent and 10 s readings taken in a TD-20/20 luminometer (Steptech Instrument  
194 Services, Stevenage, UK). A standard curve was obtained for ATP at concentrations  
195 ranging from  $10^{-6}$  to  $10^{-11}$  M and experimental values calculated using Microsoft Excel.

196

197 *Statistical Analysis:*

198 *A combined principal components-canonical variates analysis* (PC-CVA) was carried  
199 out for both the FT-IR spectra and GC-MS data using programs written in MATLAB as  
200 detailed elsewhere<sup>2</sup>. PCA was carried out initially for 100 PCs as described in Jolliffe<sup>7</sup>  
201 and CVA was carried out as described elsewhere<sup>8,9</sup>. CVA is a supervised method that  
202 allows groups in the data to be defined. CVA classes were defined according to the 15  
203 replicates (5 replicate cultures x 3 instrument replicates, 12 for GC-MS for which a  
204 small number of samples did not chromatograph well). The CVA was validated by  
205 dividing the data into training and test sets and varying the number of PCs used in the  
206 analysis. An n-fold interchange of training and test data (for FT-IR n=5; for GC-MS  
207 n=4) was employed and the optimum number of PCs was selected where clustering of  
208 the data was seen according to the classification, and where the PC-CV scores for the  
209 test set when projected into PC-CVA fell within the bounds of the data for the training  
210 set.

211

212 *ANOVA analysis:* Anova was carried out on the GC-MS data between cells exposed to  
213 water and cells exposed to each pharmaceutical. ANOVA was carried out using  
214 programs written in Matlab and described elsewhere.<sup>10</sup> The family-wise error rate  
215 (FWER) was used to determine a threshold for significance for independent or

216 positively correlated variables.<sup>11</sup> The area under the receiver operator characteristic  
217 curve (ROC), considered to be one of the best means by which to describe the utility of  
218 a variable in binary classification was also calculated.<sup>12</sup> If the area under the ROC curve  
219 (AUC) is 0.5 then the variable is distributed similarly between case and control; for a  
220 metabolite entirely diagnostic of the class the AUC is 1. Results were visualised as a  
221 plot of the AUC vs. the p-value, and metabolites with an ROC > 0.85, with  $p < 0.01$   
222 selected for correlation analysis.

223

224 *Correlation Analysis* was carried out for significant metabolites identified from the  
225 ANOVA analysis of GC-MS data, observing correlations between metabolites in *P.*  
226 *putida* exposed to water, and contrasting these with correlations in *P. putida* exposed to  
227 individual pharmaceuticals. Even under uniform experimental conditions, the  
228 concentrations of metabolites in a metabolomic data set show a degree of variability  
229 between biological replicates. Metabolite concentrations do not vary independently, but  
230 are highly interconnected via metabolic correlation networks.<sup>13</sup> Firstly, inevitable small  
231 differences in enzyme concentrations, reflecting differences in gene expression, affect  
232 metabolite concentrations and result in interdependencies between metabolites.  
233 Secondly, cellular metabolism is influenced by a number of environmental factors, such  
234 as light intensity or nutrient supply. Rapidly changing diminutive differences, even in an  
235 approximately constant environment, result in changes in metabolite concentrations,  
236 which propagate through the network and result in a specific pattern of correlations.  
237 Correlation between two metabolites is the combined result of many biochemical  
238 reactions, regulatory interactions and the inducing fluctuations that regulate the system.  
239 The pair-wise correlation network represents a snapshot of the physiological state of the

240 sample at a given point in time. Systematic comparison of correlations across different  
241 experimental conditions can reveal invariant features of cellular metabolism. Likewise,  
242 changes in correlations can point to key points at which regulation has changed.<sup>14</sup>  
243 Correlation analysis was carried out for significant metabolites, with an area under the  
244 ROC curve  $> 0.85$ , the inputs for the analysis again being the median-scaled GC-MS  
245 peak responses. Correlation analysis was carried out using Graphviz open source graph  
246 visualization software<sup>15</sup> following an approach proposed by Kamada and Kawai<sup>16</sup>,  
247 where an ideal spring is placed between every pair of nodes such that its length is set to  
248 the shortest path distance between the endpoints. The spring constant is proportional to  
249 the correlation between nodes and the geometric distance between nodes approximates  
250 their path distance in the graph. In statistics, this algorithm is also known as  
251 multidimensional scaling and its application to graph drawing was noted by Kruskal and  
252 Seery.<sup>17</sup> Here, the nodes are the identified significant metabolites and edges only exist  
253 between two nodes if the Spearman’s rank correlation coefficient is  $>0.8$ . For the  
254 correlation analysis the critical p-value was set to the more usual value of 0.01. The  
255 reasoning behind this is that if several metabolite peaks are highly correlated (and  
256 possibly biologically linked) and also significant biomarkers (at the  $<0.01$  level) then it  
257 is unlikely that they are false discoveries.

258

259 ANOVA analysis was carried out for the ATP concentration prior to and 1 hour after  
260 exposure in cells exposed to water as a control and in cells exposed to propranolol. The  
261 critical p-value for rejecting the null hypothesis in a single test selected was the more  
262 usual value of 0.01.

263

264 **Results and Discussion** for the determination of minimum inhibitory concentrations,  
265 the effect of each pharmaceutical on growth and monitoring recovery of the  
266 pharmaceuticals by HPLC.

267

268 Initially the growth curves for *P. putida* exposed to the pharmaceuticals were measured  
269 using a Bioscreen C200 workstation. The mean growth rate for the control cultures was  
270  $0.269 \pm 0.002 \text{ h}^{-1}$ , for *P. putida* exposed to acetaminophen  $0.264 \pm 0.002 \text{ h}^{-1}$ , atenolol  
271  $0.265 \pm 0.003 \text{ h}^{-1}$ , diclofenac  $0.267 \pm .004 \text{ h}^{-1}$ , ibuprofen  $0.267 \pm .003 \text{ h}^{-1}$ , mefenamic  
272 acid  $0.266 \pm .005 \text{ h}^{-1}$  and propranolol  $0.262 \pm 0.001 \text{ h}^{-1}$ . The mean OD at the end of the  
273 exponential growth phase (8h) for the control cultures was  $0.493 \pm 0.008 \text{ AU}$ , for  
274 cultures exposed to acetaminophen  $0.488 \pm 0.009 \text{ AU}$ , atenolol  $0.492 \pm 0.105 \text{ AU}$  ,  
275 diclofenac  $0.491 \pm 0.005 \text{ AU}$ , ibuprofen  $0.493 \pm 0.006$ , mefenamic acid  $0.492 \pm 0.004$   
276  $\text{AU}$  and propranolol  $0.480 \pm 0.006 \text{ AU}$ .

277 In shaken culture comparable to the metabolomics experiments, the mean growth rate  
278 for the control cultures was  $0.517 \pm 0.027 \text{ h}^{-1}$ , for *P. putida* exposed to acetaminophen  
279  $0.516 \pm 0.011 \text{ h}^{-1}$ , atenolol  $0.502 \pm 0.015 \text{ h}^{-1}$ , diclofenac  $0.517 \pm 0.012 \text{ h}^{-1}$  ibuprofen  
280  $0.510 \pm 0.022 \text{ h}^{-1}$ , mefenamic acid  $0.503 \pm 0.008 \text{ h}^{-1}$  and propranolol  $0.494 \pm 0.015 \text{ h}^{-1}$ .  
281 The mean OD (1:10 dilution) at the end of the exponential growth phase (15h) for the  
282 control cultures was  $0.170 \pm 0.004 \text{ AU}$ , for cultures exposed to acetaminophen  $0.155 \pm$   
283  $0.004 \text{ AU}$ , atenolol  $0.156 \pm 0.003 \text{ AU}$ , diclofenac  $0.172 \pm 0.003 \text{ AU}$ , ibuprofen  $0.162 \pm$   
284  $0.002$ , mefenamic acid  $0.170 \pm 0.002 \text{ AU}$  and propranolol  $0.142 \pm 0.003 \text{ AU}$ .

285

286 Recovery of the pharmaceuticals from cultures of *P. putida* was monitored by HPLC  
287 with quantification based on HPLC peak area and comparison with external standards  
288 used in producing a standard curve. Propranolol was the only pharmaceutical detected in

the methanol cell extracts; a total of 38.4  $\mu\text{g mL}^{-1}$  was detected in the *P. putida* culture supernatant and cell extract combined compared to 43.4  $\mu\text{g mL}^{-1}$  in the sterile control. This small change in concentration ( $< 10\%$ ) indicates little metabolism of propranolol by *P. putida* or degradation in solution over 24h. The remaining pharmaceuticals were recovered completely from the culture supernatants compared with the sterile controls at concentrations  $> 41\mu\text{g mL}^{-1}$ , indicating little microbial degradation, or chemical degradation in solution.

*Multivariate Analysis of GC-MS Data:* Cross-validated PC-CVA models were generated for the GC-MS data of *P. putida* exposed to pharmaceuticals at 50  $\mu\text{g mL}^{-1}$ . PC-CVA was performed for 6 pharmaceuticals and control using 4 PCs selected after a 4-fold interchange of training and validation sets, as detailed above. Figure SI1a shows the PC-CV score 1 plotted against PC-CV score 2 and shows extracts from *P. putida* exposed to propranolol separated from remaining classes along PC-CV1, for cells exposed to acetaminophen along PC-CV1 and PC-CV2, and for cells exposed to mefenamic acid along PC-CV2. The model showed greater discrimination for *P. putida* exposed to propranolol and acetaminophen than any between the remaining pharmaceutical classes and control. Models were generated which discriminate between individual classes and control (shown for ibuprofen in SI3 Figure 1b).

## References

1. M. Delamoye, C. Duveneuil, F. Paraire, P. deMazancourt and J.-C. Alvarez, *Forensic Science International*, 2004, **141**, 23-31.
2. R. Goodacre, É. M. Timmins, R. Burton, N. Kaderbhai, A. M. Woodward, D. B. Kell and P. J. Rooney, *Microbiol.*, 1998, **144**, 1157-1170.
3. *MATLAB 7.1.*, TheMathWorks, Cambridge, United Kingdom, 2007.
4. C. L. Winder, W. B. Dunn, S. Schuler, D. Broadhurst, R. Jarvis, G. M. Stephens and R. Goodacre, *Analytical Chemistry*, 2008, **80**, 2939-2948.

- 317 5. S. O'Hagan, W. B. Dunn, M. Brown, J. D. Knowles and D. B. Kell, *Analytical*  
318 *Chemistry*, 2005, **77**, 290-303.
- 319 6. G. A. Pope, D. A. MacKenzie, M. Defernez, M. A. M. M. Aroso, L. J. Fuller, F.  
320 A. Mellon, W. B. Dunn, M. Brown, R. Goodacre, D. B. Kel, M. E. Marvin, E. J.  
321 Louis and I. N. Roberts, *Yeast*, 2007, **24**, 667-679.
- 322 7. I. T. Jolliffe, *Principal component analysis.*, Springer-Verlag, New York, 1986.
- 323 8. H. J. H. Macfie, C. S. Gutteridge and J. R. Norris, *Journal of General*  
324 *Microbiology*, 1978, **104**, 67-74.
- 325 9. W. Windig, J. Haverkamp and P. G. Kistemaker, *Analytical Chemistry*, 1983,  
326 **55**, 81-88.
- 327 10. D. Broadhurst and D. B. Kell, *Metabolomics*, 2006, **2**, 171-196.
- 328 11. Y. Benjamini and D. Yekutieli, *The Annals of Statistics* 2001, **29**, 1165-1188.
- 329 12. A. Linden, *Journal of Evaluation in Clinical Practice*, 2006, **12**, 132-139.
- 330 13. R. Steuer, K. J., F. O. and W. W., *Bioinformatics*, 2003, **19**, 1019-1026.
- 331 14. R. Steuer, *Briefings in Bioinformatics* 2006, **7**, 151-158.
- 332 15. E. R. Gansner and S. C. North, *Software: practice and experience*, 2000, **30**,  
333 1203-1233.
- 334 16. T. Kamada and S. Kawai, *Information Processing Letters*, 1989, **31**, 7-15.
- 335 17. J. B. Kruskal and J. B. Seery, *1st General Conference on Social Graphics*, 1980,  
336 22-50.

337
