# Supplementary material for: Metabolomics reveals the physiological response of Pseudomonas putida KT2440 (UWC1) after pharmaceutical exposure
Source: Royal Society of Chemistry journal article supplement (doi:10.1039/c5mb00889a), 2016-02-24
Supplement: c5mb00889a2.pdf [file c5mb00889a2.pdf]

Currie, F. *et al.*

Supplementary Information 2 for the paper ‘**Metabolomics reveals the physiological response of *Pseudomonas putida* KT2440 (UWC1) after pharmaceutical exposure.**’

**Table SI2 1. 67 Metabolites that were Altered Significantly in *P. putida* on Exposure to Pharmaceuticals.**

Metabolites are listed together with the p-value and fold difference in median GC-MS peak response. In order to view alterations which are common to exposure to the different pharmaceuticals, the 67 metabolites are ordered firstly by significance (p-value) for exposure to propranolol, followed significance for exposure to diclofenac, ibuprofen, acetaminophen etc.

| Metabolite ID | Metabolite Name                  | Definitive ID | Exposure to Propranolol |                                    | Exposure to Diclofenac |                                   | Exposure to Ibuprofen |                                   | Exposure to Acetaminophen |                                   | Exposure to Atenolol |                                   | Exposure to Mefenamic acid |                                   |
|---------------|----------------------------------|---------------|-------------------------|------------------------------------|------------------------|-----------------------------------|-----------------------|-----------------------------------|---------------------------|-----------------------------------|----------------------|-----------------------------------|----------------------------|-----------------------------------|
|               |                                  |               | p-value                 | Fold Difference exposed / control* | p-value                | Fold Difference exposed / control | p-value               | Fold Difference exposed / control | p-value                   | Fold Difference exposed / control | p-value              | Fold Difference exposed / control | p-value                    | Fold Difference exposed / control |
| 129           |                                  |               | 8.90E-06                | 0.00                               | 2.19E-03               | 0.74                              | 1.06E-01              | 0.89                              | 7.35E-02                  | 0.8847                            | 3.26E-01             | 0.9571                            | 5.96E-05                   | 0.3480                            |
| 139           |                                  |               | 8.90E-06                | Inf                                |                        |                                   |                       |                                   |                           |                                   |                      |                                   |                            |                                   |
| 142           |                                  |               | 8.90E-06                | Inf                                |                        |                                   |                       |                                   |                           |                                   |                      |                                   |                            |                                   |
| 145           |                                  |               | 8.90E-06                | Inf                                |                        |                                   |                       |                                   |                           |                                   |                      |                                   |                            |                                   |
| 150           | Propranolol                      | *             | 8.90E-06                | Inf                                |                        |                                   |                       |                                   |                           |                                   |                      |                                   |                            |                                   |
| 13            | glutamic acid                    | *             | 2.80E-05                | 0.02                               | 9.54E-01               | 0.68                              | 2.25E-01              | 0.79                              | 1.52E-02                  | 0.3128                            | 1.00E+00             | 0.8133                            | 1.00E+00                   | 0.7686                            |
| 37            | myo-inositol                     | *             | 3.23E-05                | 0.66                               | 3.89E-03               | 0.86                              | 9.08E-01              | 0.94                              | 9.41E-02                  | 0.8846                            | 5.58E-03             | 0.8838                            | 6.44E-01                   | 1.0357                            |
| 46            | glycerol-2-phosphate             |               | 3.23E-05                | 2.03                               | 3.89E-03               | 0.88                              | 1.19E-01              | 1.29                              | 1.84E-01                  | 1.1955                            | 1.82E-03             | 1.2809                            | 6.03E-01                   | 0.8168                            |
| 68            | 2-chlorotriethanolamine          |               | 3.23E-05                | 0.84                               | 4.76E-04               | 0.89                              | 9.08E-01              | 0.99                              | 1.49E-01                  | 0.9335                            | 4.53E-01             | 0.9673                            | 3.77E-02                   | 0.7701                            |
| 113           |                                  |               | 3.23E-05                | 0.81                               | 1.19E-01               | 1.04                              | 1.66E-01              | 1.03                              | 7.73E-01                  | 1.0045                            | 3.86E-01             | 1.0555                            | 9.37E-03                   | 1.2101                            |
| 125           | sugar phosphate                  |               | 6.78E-05                | 2.13                               | 8.62E-01               | 0.74                              | 2.25E-01              | 1.21                              | 4.96E-02                  | 1.4344                            | 2.25E-01             | 1.2519                            | 4.88E-01                   | 0.8603                            |
| 52            | 2-monopalmitin                   |               | 9.08E-05                | 0.00                               | 9.38E-02               | 0.81                              | 1.24E-02              | 0.16                              | 4.36E-03                  | 0.1522                            | 1.12E-03             | 0.1557                            | 9.16E-02                   | 0.4651                            |
| 45            | heptadecanoic acid               |               | 1.10E-04                | 0.49                               | 3.86E-01               | 1.02                              | 5.67E-02              | 1.06                              | 2.82E-02                  | 1.0682                            | 4.88E-01             | 0.9672                            | 9.54E-01                   | 0.9734                            |
| 111           | 2-aminoethylidihydrogenphosphate |               | 1.39E-04                | 0.83                               | 1.00E+00               | 0.99                              | 1.11E-02              | 0.87                              | 3.56E-01                  | 1.1104                            | 2.73E-01             | 1.1762                            | 6.03E-01                   | 0.9609                            |
| 44            | sugar phosphate                  |               | 2.17E-04                | 1.31                               | 7.49E-01               | 0.92                              | 9.06E-01              | 0.52                              | 2.72E-04                  | 1.3325                            | 6.44E-02             | 1.1129                            | 1.38E-01                   | 1.2641                            |
| 47            |                                  |               | 2.76E-04                | 0.58                               | 3.86E-01               | 0.98                              | 3.23E-03              | 0.65                              | 3.23E-05                  | 0.6517                            | 1.22E-03             | 0.7118                            | 5.25E-01                   | 0.9069                            |
| 130           |                                  |               | 3.38E-04                | 0.00                               |                        |                                   |                       |                                   |                           |                                   |                      |                                   |                            |                                   |
| 134           |                                  |               | 3.38E-04                | Inf                                |                        |                                   |                       |                                   |                           |                                   |                      |                                   |                            |                                   |
| 135           |                                  |               | 3.38E-04                | Inf                                |                        |                                   |                       |                                   |                           |                                   |                      |                                   |                            |                                   |
| 97            | glutamic acid                    | *             | 4.24E-04                | 0.21                               | 6.44E-01               | 0.72                              | 2.25E-01              | 0.78                              | 8.33E-02                  | 0.4998                            | 1.00E+00             | 0.8133                            | 1.00E+00                   | 0.7686                            |
| 89            | alanine                          | *             | 5.26E-04                | 0.46                               | 3.75E-02               | 0.74                              | 3.26E-01              | 1.01                              | 2.98E-01                  | 0.6288                            | 1.33E-01             | 0.7220                            | 4.17E-02                   | 0.3188                            |
| 88            | phosphate                        | *             | 1.22E-03                | 0.82                               | 2.85E-01               | 0.97                              | 2.82E-02              | 0.85                              | 1.53E-02                  | 0.8176                            | 4.53E-01             | 0.9565                            | 2.48E-01                   | 1.0666                            |

Supplementary Information 2 for the paper ‘Metabolomics reveals the physiological response of *Pseudomonas putida* KT2440 (UWC1) after pharmaceutical exposure.’

| Metabolite ID | Metabolite Name                  | Definitive ID | Exposure to Propranolol |                                    | Exposure to Diclofenac |                                   | Exposure to Ibuprofen |                                   | Exposure to Acetaminophen |                                   | Exposure to Atenolol |                                   | Exposure to Mefenamic acid |                                   |
|---------------|----------------------------------|---------------|-------------------------|------------------------------------|------------------------|-----------------------------------|-----------------------|-----------------------------------|---------------------------|-----------------------------------|----------------------|-----------------------------------|----------------------------|-----------------------------------|
|               |                                  |               | p-value                 | Fold Difference exposed / control* | p-value                | Fold Difference exposed / control | p-value               | Fold Difference exposed / control | p-value                   | Fold Difference exposed / control | p-value              | Fold Difference exposed / control | p-value                    | Fold Difference exposed / control |
| 20            | phenylalanine                    | *             | 1.50E-03                | 0.73                               | 3.26E-01               | 1.08                              | 1.30E-02              | 1.27                              | 2.80E-05                  | 0.28                              | 7.29E-01             | 1.00                              | 9.38E-02                   | 0.77                              |
| 131           |                                  |               | 1.67E-03                | Inf                                |                        |                                   |                       |                                   |                           |                                   |                      |                                   |                            |                                   |
| 126           |                                  |               | 1.82E-03                | 1.89                               | 2.73E-01               | 1.09                              | 6.86E-01              | 1.08                              | 2.98E-01                  | 0.92                              | 2.99E-01             | 1.07                              | 8.62E-01                   | 1.03                              |
| 140           | trehalose                        | *             | 1.82E-03                | 0.51                               | 7.29E-01               | 1.02                              | 2.76E-04              | 0.41                              | 2.76E-04                  | 0.41                              | 5.58E-03             | 0.45                              | 3.77E-02                   | 0.61                              |
| 149           | succinic acid                    | *             | 1.82E-03                | 2.91                               | 1.49E-01               | 0.39                              | 1.53E-02              | 2.22                              | 3.27E-02                  | 2.10                              | 4.96E-02             | 1.52                              | 2.98E-01                   | 0.53                              |
| 12            | glutamic acid                    | *             | 2.68E-03                | 0.73                               | 1.00E+00               | 1.14                              | 2.48E-01              | 0.98                              | 2.68E-03                  | 0.73                              | 2.99E-01             | 0.75                              | 7.86E-03                   | 0.60                              |
| 25            |                                  |               | 2.68E-03                | 0.79                               | 8.62E-01               | 0.99                              | 3.27E-02              | 0.87                              | 3.26E-01                  | 0.93                              | 4.53E-01             | 0.99                              | 9.41E-02                   | 0.88                              |
| 146           | glycine                          | *             | 2.68E-03                | 0.57                               | 6.47E-02               | 0.67                              | 8.62E-01              | 0.98                              | 6.03E-01                  | 0.79                              | 6.03E-01             | 1.13                              | 1.66E-01                   | 0.69                              |
| 48            | octadecanoic acid                | *             | 4.67E-03                | 8.04                               | 1.53E-02               | 8.44                              | 1.66E-01              | 1.18                              | 2.82E-02                  | 7.51                              | 7.35E-02             | 3.57                              | 7.73E-01                   | 1.05                              |
| 147           |                                  |               | 4.67E-03                | 0.78                               | 8.17E-01               | 0.90                              | 4.96E-02              | 0.77                              | 9.31E-03                  | 0.52                              | 9.08E-01             | 0.94                              | 6.03E-01                   | 0.87                              |
| 137           | cellobiose                       | *             | 5.58E-03                | 0.76                               | 9.08E-01               | 0.90                              | 1.12E-03              | 0.33                              | 1.71E-02                  | 0.30                              | 3.75E-02             | 0.60                              | 1.33E-01                   | 0.92                              |
| 120           |                                  |               | 6.25E-03                | 3.62                               | 1.05E-02               | 3.23                              |                       |                                   | 9.06E-01                  | 1.71                              | 9.02E-01             | 1.03                              | 1.00E+00                   | 0.65                              |
| 114           |                                  |               | 9.37E-03                | 0.87                               | 3.56E-01               | 1.02                              | 1.49E-01              | 1.05                              | 8.62E-01                  | 1.01                              | 6.03E-01             | 0.95                              | 1.82E-03                   | 1.13                              |
| 128           |                                  |               | 9.37E-03                | 0.79                               | 6.66E-03               | 1.23                              | 3.26E-01              | 1.08                              | 2.09E-02                  | 1.18                              | 2.25E-01             | 1.20                              | 2.43E-02                   | 1.24                              |
| 144           | monostearin                      |               | 9.37E-03                | 0.84                               | 4.19E-01               | 0.95                              | 3.86E-01              | 0.89                              | 2.09E-02                  | 0.82                              | 3.77E-02             | 0.84                              | 3.56E-01                   | 0.89                              |
| 143           |                                  |               |                         |                                    | 1.96E-05               | Inf                               |                       |                                   |                           |                                   |                      |                                   |                            |                                   |
| 10            | xylitol                          | *             | 2.09E-02                | 1.36                               | 2.76E-04               | 0.65                              | 9.54E-01              | 0.99                              | 1.06E-01                  | 1.24                              | 1.00E+00             | 0.98                              | 3.86E-01                   | 1.03                              |
| 73            | 9-octadecenoic acid methyl ester |               | 8.84E-01                | 0.97                               | 3.38E-04               | 0.00                              | 4.06E-01              | 0.30                              | 2.26E-03                  | 0.00                              | 4.12E-03             | 0.00                              | 6.69E-02                   | 0.65                              |
| 98            | putrescine                       | *             |                         |                                    | 3.38E-04               | 0.00                              |                       |                                   |                           |                                   |                      |                                   |                            |                                   |
| 82            | impurity                         |               |                         |                                    | 2.26E-03               | Inf                               |                       |                                   |                           |                                   |                      |                                   |                            |                                   |
| 3             | aspartic acid                    | *             | 1.19E-01                | 0.72                               | 2.68E-03               | 0.62                              | 6.86E-01              | 0.97                              | 4.88E-01                  | 1.03                              | 1.00E+00             | 1.00                              | 8.30E-02                   | 0.76                              |
| 108           |                                  |               | 6.69E-02                | 0.69                               | 3.38E-03               | 0.00                              | 2.82E-02              | 0.23                              | 2.26E-03                  | 0.00                              | 2.26E-03             | 0.00                              | 3.38E-04                   | 0.00                              |
| 95            |                                  |               | 1.19E-01                | 1.45                               | 7.91E-03               | 0.47                              | 3.89E-03              | 2.70                              | 1.82E-03                  | 2.50                              | 5.67E-02             | 1.69                              | 2.48E-01                   | 0.87                              |
| 35            |                                  |               | 3.77E-02                | 0.65                               | 9.37E-03               | 0.61                              | 9.89E-04              | 0.29                              | 1.66E-01                  | 0.41                              | 1.53E-02             | 0.50                              | 3.56E-01                   | 0.39                              |
| 81            | ethanolamine                     |               | 3.86E-01                | 1.04                               | 9.37E-03               | 1.68                              | 7.73E-01              | 1.12                              | 3.56E-01                  | 0.92                              | 1.19E-01             | 1.28                              | 3.86E-01                   | 1.29                              |
| 14            | putrescine                       | *             | 7.32E-02                | 1.32                               | 8.17E-01               | 0.92                              | 1.81E-03              | 1.85                              | 1.19E-01                  | 1.52                              | 1.91E-01             | 1.31                              | 4.32E-01                   | 0.85                              |
| 36            | pentadecanoic acid               |               | 3.27E-02                | 1.15                               | 7.29E-01               | 1.04                              | 3.23E-03              | 1.14                              | 5.58E-03                  | 1.13                              | 2.73E-01             | 1.10                              | 7.73E-01                   | 1.09                              |
| 91            | beta-alanine                     |               | 1.30E-02                | 0.66                               | 1.79E-02               | 0.72                              | 3.89E-03              | 1.40                              | 2.99E-01                  | 0.97                              | 2.99E-01             | 1.35                              | 6.03E-01                   | 0.75                              |
| 75            | sugar or sugar alcohol           |               | 2.04E-01                | 1.26                               | 5.25E-01               | 1.06                              | 3.89E-03              | 0.80                              | 2.68E-03                  | 0.67                              | 2.99E-01             | 0.81                              | 4.53E-01                   | 0.89                              |
| 42            | sugar or sugar alcohol           |               | 3.86E-01                | 0.87                               | 9.08E-01               | 1.05                              | 6.25E-03              | 0.05                              | 3.25E-02                  | 0.18                              | 3.75E-02             | 0.16                              | 3.63E-03                   | 0.09                              |
| 100           | tropic acid                      |               | 3.77E-02                | 0.61                               | 4.33E-02               | 1.43                              | 6.66E-03              | 0.46                              | 4.96E-02                  | 0.60                              | 9.08E-01             | 0.99                              | 1.84E-01                   | 0.83                              |
| 39            | hexadecenoic acid                | *             | 5.25E-01                | 1.00                               | 3.86E-01               | 0.97                              | 7.91E-03              | 0.90                              | 1.33E-01                  | 0.98                              | 3.26E-01             | 0.97                              | 4.96E-02                   | 0.93                              |

Supplementary Information 2 for the paper ‘**Metabolomics reveals the physiological response of *Pseudomonas putida* KT2440 (UWC1) after pharmaceutical exposure.**’

| Metabolite ID | Metabolite Name                 | Definitive ID | Exposure to Propranolol |                                    | Exposure to Diclofenac |                                   | Exposure to Ibuprofen |                                   | Exposure to Acetaminophen |                                   | Exposure to Atenolol |                                   | Exposure to Mefenamic acid |                                   |
|---------------|---------------------------------|---------------|-------------------------|------------------------------------|------------------------|-----------------------------------|-----------------------|-----------------------------------|---------------------------|-----------------------------------|----------------------|-----------------------------------|----------------------------|-----------------------------------|
|               |                                 |               | p-value                 | Fold Difference exposed / control* | p-value                | Fold Difference exposed / control | p-value               | Fold Difference exposed / control | p-value                   | Fold Difference exposed / control | p-value              | Fold Difference exposed / control | p-value                    | Fold Difference exposed / control |
| 90            | glycerol                        | *             | 6.03E-01                | 0.92                               | 5.64E-01               | 0.84                              | 7.91E-03              | 1.38                              | 1.00E+00                  | 0.87                              | 2.09E-02             | 1.26                              | 5.64E-01                   | 0.92                              |
| 34            | 2-deoxycytidine-5-monophosphate |               | 6.86E-01                | 0.91                               | 8.17E-01               | 1.08                              | 7.91E-03              | 0.86                              | 9.08E-01                  | 1.02                              | 3.86E-01             | 1.04                              | 7.29E-01                   | 1.11                              |
| 56            | maltose                         | *             | 1.53E-02                | 1.38                               | 1.19E-01               | 1.24                              | 9.37E-03              | 0.69                              | 2.04E-01                  | 0.83                              | 4.53E-01             | 0.95                              | 6.03E-01                   | 1.12                              |
| 124           | sugar or sugar alcohol          |               | 3.56E-01                | 0.93                               | 5.67E-02               | 0.86                              | 1.30E-02              | 0.75                              | 1.75E-04                  | 0.62                              | 3.77E-02             | 0.81                              | 4.19E-01                   | 0.96                              |
| 112           |                                 |               | 4.19E-01                | 0.92                               | 2.73E-01               | 1.03                              | 2.25E-01              | 0.94                              | 8.04E-04                  | 0.76                              | 1.49E-01             | 0.93                              | 9.41E-02                   | 1.09                              |
| 79            |                                 |               | 6.03E-01                | 0.98                               | 2.73E-01               | 0.85                              | 2.99E-01              | 1.02                              | 1.82E-03                  | 1.87                              | 8.33E-02             | 1.20                              | 4.19E-01                   | 1.61                              |
| 29            | citric acid                     | *             |                         |                                    |                        |                                   |                       |                                   |                           |                                   | 3.38E-04             | Inf                               |                            |                                   |
| 63            |                                 |               | 6.35E-01                | 1.88                               | 3.24E-01               | 0.78                              | 8.53E-01              | 0.92                              | 8.55E-02                  | 2.28                              | 1.12E-03             | 2.57                              | 7.52E-02                   | 2.76                              |
| 19            | impurity                        |               | 1.46E-01                | 1.73                               | 5.03E-02               | 3.32                              | 5.37E-01              | 1.49                              | 2.82E-02                  | 4.44                              | 1.68E-03             | 3.50                              | 1.23E-01                   | 3.39                              |
| 65            | glycerol-2-phosphate            |               | 1.06E-01                | 0.78                               | 6.21E-01               | 0.87                              | 9.54E-01              | 0.95                              | 4.88E-01                  | 0.98                              | 3.21E-03             | 1.30                              | 9.30E-01                   | 1.03                              |
| 109           |                                 |               | 9.54E-01                | 1.01                               | 8.33E-02               | 1.09                              | 5.67E-02              | 1.16                              | 1.33E-01                  | 1.07                              | 3.86E-01             | 1.05                              | 8.12E-04                   | 1.23                              |
| 122           | N-acetylglucosamine             | *             | 3.86E-01                | 0.98                               | 1.84E-01               | 1.36                              | 8.33E-02              | 1.07                              | 3.77E-02                  | 1.19                              | 4.19E-01             | 1.27                              | 4.67E-03                   | 1.29                              |
| 72            | sugar or sugar alcohol          |               | 1.00E+00                | 1.60                               | 7.11E-01               | 0.94                              | 4.17E-02              | 2.33                              | 1.81E-01                  | 2.18                              | 8.12E-01             | 1.86                              | 7.45E-03                   | 2.75                              |

\* fold difference is the fold difference in GC-MS peak response. Inf(inity) implies an increase in exposed cells from zero in control cells, while zero implies a fall to zero in exposed cells from some value in control cells. Statistically significant alterations are highlighted in yellow.
